# Supplementary material for: Up-conversion luminescent switch based on photochromic diarylethene and rare-earth nanophosphors
Source: Royal Society of Chemistry journal article supplement (doi:10.1039/b809021a), 2008-01-01
Supplement: b809021a.pdf [file b809021a.pdf]

## Supporting Information

### **Up-conversion Luminescent Switch Based on Photochromic Diarylethene and Rare Earth Nanophosphors**

Zhiguo Zhou, He Hu, Hong Yang, Tao Yi\*, Kewei Huang, Mengxiao Yu, Fuyou Li\*, Chunhui Huang

*Department of Chemistry & Laboratory of Advanced Materials, Fudan University, Shanghai, 200433, P. R. China;*

To whom correspondence should be addressed. E-mail: yitao@fudan.edu.cn, fyli@fudan.edu.cn.

#### **General experiment**

Sizes and morphologies of LaF<sub>3</sub>: Yb, Ho were determined at 200 kV using a JEOL JEM-2010F high-resolution transmission electron microscope (HR-TEM). X-ray diffraction (XRD) measurements were carried out on a Bruker D4 X-ray diffractometer using Cu K $\alpha$  radiation ( $\lambda = 0.15418$  nm). Photochromic reactions were done on a CHF-XM-500W system (Beijing, China) with a 500W Xe lamp as the light source. 340 and 560 nm monochromatic light were obtained by band-pass filters with the half width of 10 nm (Omega). UV-Vis spectra were recorded on a Shimadzu UV-2250 spectrophotometer. Luminescence spectra were measured with an Edinburgh FLS-920 fluorescence spectrometer.

Up-conversion luminescence spectra were obtained using an external 0-800 mW adjustable continuous wave laser (980 nm, Beijing Hi-Tech Optoelectronic Co., China) as the excitation source instead of the Xenon source in the spectrophotometer. Confocal fluorescence imaging was performed with an Olympus IX81 laser scanning microscopy excited by 980 nm laser. Emission was collected from 500 to 600 nm.

The thin films were prepared by spin-coating the CHCl<sub>3</sub> solution of LaF<sub>3</sub>: Yb, Ho, **1** and PMMA mixture onto glass substrates at a spin rate of 1000 rpm for 30 s. The concentration of LaF<sub>3</sub>: Yb, Ho and PMMA was fixed (2 mg / mL, 10 mg / mL, respectively). The concentration of DTE was from 0 to 8 mg / mL.

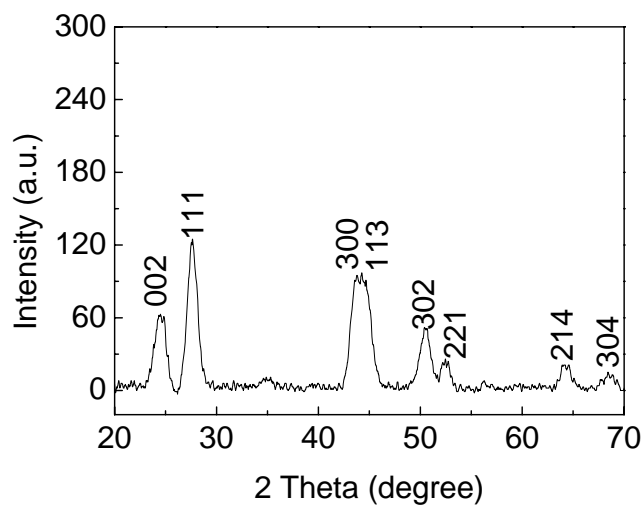

Figure S1 XRD pattern of  $\text{LaF}_3$ : Yb, Ho nanophosphors

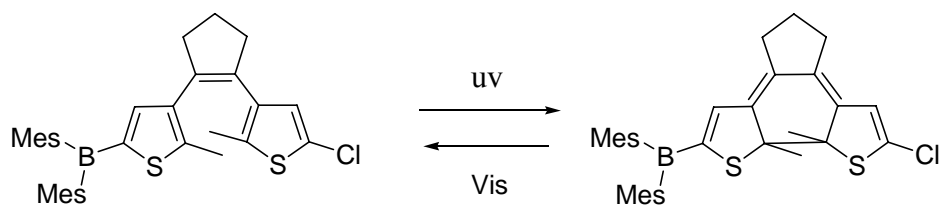

Figure S2 Closing and opening process of compound **1**
